# Supplementary material for: Long Range Plasma Momentum Coupling by High Voltage Static Electric field and Deep Space Exploration
Source: Copernicus journal article supplement (doi:10.5194/angeo-2019-41), 2019-05-09
Supplement: Supplementary file [file angeo-2019-41-AC1-supplement.pdf]

# Long Range Plasma Momentum Coupling by High Voltage Static Electric field and Deep Space Exploration

KokWei Chew<sup>1</sup>, Xinyu Zhou<sup>1</sup>, and Yian Lei<sup>1</sup>

<sup>1</sup>School of Physics, Peking University, Beijing 100871, China

*Correspondence to:* Yian Lei (yalei@pku.edu.cn)

**Abstract.** Space exploration has been long constrained by the efficiency and capability of modern chemical rocket. Propellantless propulsion has been proposed as a solution to expand the boundary of space exploration. In this paper, we examine the possibilities of a propellantless propulsion scheme through the interaction between the spacecraft and ambient plasma. The spacecraft is charged to high electric potential by constantly shooting electrons away. The high voltage spacecraft will deplete the surrounding electrons, thus interact with a wide range of the background plasma (solar wind) and thus effectively extract momentum from the plasma. By taking advantage of the exploitable ambient plasma, a spacecraft can reach very high speed, thus considerably reducing the travel time. The scheme is also applicable for braking, which is helpful in the exploration of inner planets like Venus and Mercury, and the stopping at the destination planets or stars.

## 1 Introduction

Space exploration is the next step of human development. The main difficulty experienced in space travel is the long distance across planets, stars, or galaxies, and the low limitation of fuel. The average distance between planets in solar system is about 5.5 Astronomical units (AU) or 800 million km away, and the closest star system, the Alpha Centauri is 4.37 light-years ( $4.1 \times 10^{16}$  m) away from solar system. Contemporary spacecraft can hardly reach a speed of  $40 \text{ kms}^{-1}$ , with the help of multiple slingshot acceleration of the planets. The speed is far too low, considering the travelling to the Alpha Centauri will takes longer than the entire human history.

Propellantless propulsion is a scheme proposed to overcome the problems of limited fuels carried by chemical rockets as well as ion thrusters. To date, various kinds of propellantless schemes such as electric sail and solar sail has been proposed as an alternative to chemical rockets for interplanetary or interstellar space travelling. In this paper, we propose a propellantless propulsion scheme by coupling the spacecraft with the ambient plasma to extract its momentum. The spacecraft is charged to high electric potential by constantly shooting electrons far away. The high voltage spacecraft will interact with a wide range of the background plasma (solar wind) in momentum and gain thrust. Comparing with the electric sail proposed by P. Janhunen (2007, 2014), the effective radius of the spacecraft can be held within 100 m to provide better control and manoeuvring.

The key challenge in the engineering for this scheme is maintaining high potential of the spacecraft. The spacecraft has to accelerate and shot electrons far away to remain high potential and couple with ambient plasma. As electron is the lightest charged particle, with a mass three orders of magnitudes smaller than the lightest ion, hence can be easily deflected by

31 magnets, electron acceleration is the easiest and most durable in engineering. Conventional non-superconducting electron  
32 injectors (Bluem et al. 2004) can accelerate electrons to 5 MeV with a compact size, and operate continuously at a maximum  
33 current of 1 A. These two parameters set an upper limit on the potential and current of our scheme.  
34 The feasibility of maintaining high potential also limited by the field ion evaporation effect or field evaporation (FEV) (Zurlev  
35 et al. 2003). FEV is the removal of surface atom from its own lattice structure by induced electric field. The whole process is  
36 rather complicated and not well studied yet. In general, when the electric field of a surface exceeded certain threshold, called  
37  $E^e$ , there will be significant increase in the FEV process and deplete the structure. A theoretical estimation given by Dinko N.  
38 Zurlev (Forbes, 2006) showed that the  $E^e$  for most metals is at the order of  $10 \text{ Vnm}^{-1}$ . For our spacecraft design with an  
39 effective radius of 100m, the threshold potential is at the order of  $10^{12} \text{ V}$ , which is 6 orders of magnitude beyond our limit and  
40 thus should not be a problem.

## 41 2 Concept

42 The spacecraft interact with the ambient plasma through static electric field. Comparing with the electric sail design as  
43 proposed by P. Janhunen, our concept consists of a spacecraft located at the centre and linked to several positively charged  
44 lightweight balls by conducting tethers. The distance from spacecraft to the balls could be a few hundreds of meters. The  
45 spherical shape of balls is designed to reduce the FEV effect. Due to electric static repulsion; all the balls will distribute evenly  
46 around the spacecraft. When deployed for operation, the electron gun is pointed to the opposite or perpendicular direction of  
47 the solar wind for ejecting the electrons away from the spacecraft. **The whole structure can be treated as a metallic ball with**  
48 **an effective radius and a constant potential (being a conductor). As the potential profile outside the ball is close to Coulomb**  
49 **potential as explained below, the larger the effective radius is, the lower energy is required to shot the electrons away, hence**  
50 **the higher energy efficiency. The dynamic positively charged spacecraft-plasma combo can interact with much larger range**  
51 **of ambient plasma than in a quasi-neutral plasma as originally proposed by P. Janhunen, in which the influence of the potential**  
52 **is limited by Debye length.**

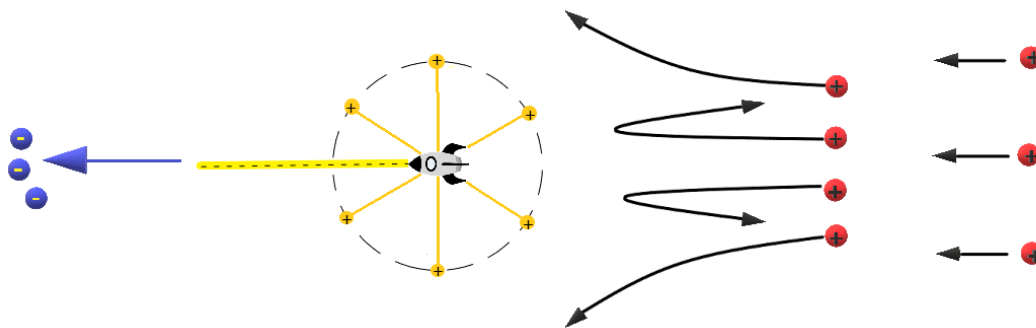

53  
54 **Figure 1: plasma wind coming from the right side being deflection by the electrostatic field of the spacecraft. The whole structure is**  
55 **consisted of a main unit at the center and connected to charged balls attached to the main unit.**

56 For the sake of simplicity in simulation, the whole structure is treated as a sphere with the distance from spacecraft  
 57 to the balls as the radius of the imaginary sphere. The sphere is charged to a surface potential of  $V_0$ , A stream of plasma (solar  
 58 wind) moving from the positive x direction. We consider only 1 species of ion, the protons. The deflection of protons from its  
 59 trajectories provides the momentum. The loss in x-direction momentum of protons is transferred to the spacecraft. To calculate  
 60 the trajectory and hence the momentum, the potential generated by the sphere need to be addressed. For theoretical estimation,  
 61 we consider the potential to be a central force and takes the forms of either Coulomb potential or Debye potential.

62 In the absence of plasma, the potential generated by the sphere would be a simple Coulomb potential:

$$63 \quad V(r) = \frac{V_0 r_0}{r}, \quad (1)$$

64 Where  $r_0$  is the radius of the sphere and  $V_0$  is the potential at the surface of the sphere and the potential at far point is zero.  
 65 Due to the presence of ambient plasma, shielding occurred and the potential dropped by and exponential factor. The effective  
 66 potential is:

$$67 \quad V(r) = \frac{V_0 r_0}{r} e^{-\frac{r-r_0}{\lambda_D}}, \quad (2)$$

68 Where  $\lambda_D$  is the effective Debye length,  $\lambda_D = \sqrt{\varepsilon_0(V_0 - V_1)/n_0 e}$  (Janhunen et al. 2016).  $V_1$  is the kinetic energy of the  
 69 incoming proton.

70 We can estimate thrust by solving the equation of motion of the proton in a Coulomb potential. The deflection or  
 71 scattering of protons,  $\theta$  from its original direction is calculated from:

$$72 \quad b = \frac{V_0 r_0 e}{2E_k} \cot \frac{\theta}{2}, \quad (3)$$

73 Where  $b$  is the impact parameter,  $E_k$  is the kinetic energy of protons in solar wind. In this case, we set  $\theta$  to 90 degree, the  
 74 impact parameter  $b$  represent how far the electric field can affect and repel the protons from solar wind. Assuming  $V_0 = 1$  MV,  
 75  $r_0 = 100$  m,  $E_k = 1.5$  keV, we can have the impact parameter  $b = 33$  km and thus an effective scattering cross section of  
 76  $3400$  km<sup>2</sup>. The solar wind pressure at 1 AU from the Sun is 2 nPa and the spacecraft is estimated to acquire 6.8 N of thrust at  
 77 the Earth's orbit.

78 In reality, the potential can never be a symmetric Coulomb potential due to the presence of plasma. The next part of  
 79 this paper will provide simulation result for the actual thrust obtained by the spacecraft.

### 80 3 1D Simulation

81 In 1D simulation, the system will reach a static condition after the spacecraft is charged. The particles (ions) interact with the  
 82 charged spacecraft and eventually the potential around the spacecraft takes the form as described by equation 2. The deflection  
 83 of protons from its own trajectory contribute the x-direction momentum to the spacecraft. As shown in figure 2, the spacecraft  
 84 is located at the origin. The ions is coming from the +x direction and assumed to have initial velocity in the x-direction. The  
 85 motion of the particle calculated by Runge-Kutta method with adaptive time-steps for error control.

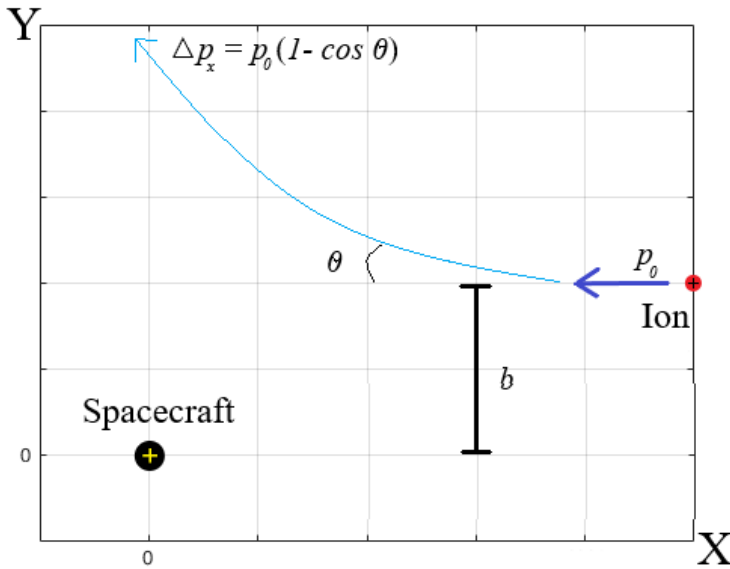

86

87 **Figure 2: The spacecraft located at the origin and the ions from solar wind coming from the positive x direction.**

88

89 The model for 1D simulation is rather simple. It provides the relation between the thrust generated and key parameters  
 90 like spacecraft surface potential  $V_0$ , radius  $r_0$  and solar wind density  $n_0$ . This provide a basis for calculating the trajectories for  
 91 interplanetary travel for our spacecraft. Figure 3 and table 1 shows the scaling relation between the thrust and surface potential  
 of surface as well as solar wind density.

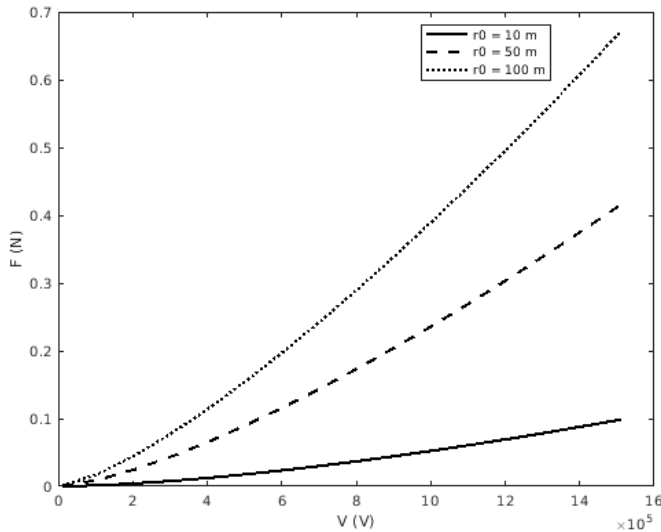

92

93 **Figure 3(a): The relation between thrust  $F$  and the surface potential of the sphere  $V_0$ . Dotted line:  $r_0 = 100$  m, dashed line:  $r_0 =$   
 94  $50$  m, solid line:  $r_0 = 10$  m. Plasma density  $n_0 = 1.2 \times 10^6 \text{ m}^{-3}$ .**

95  
96

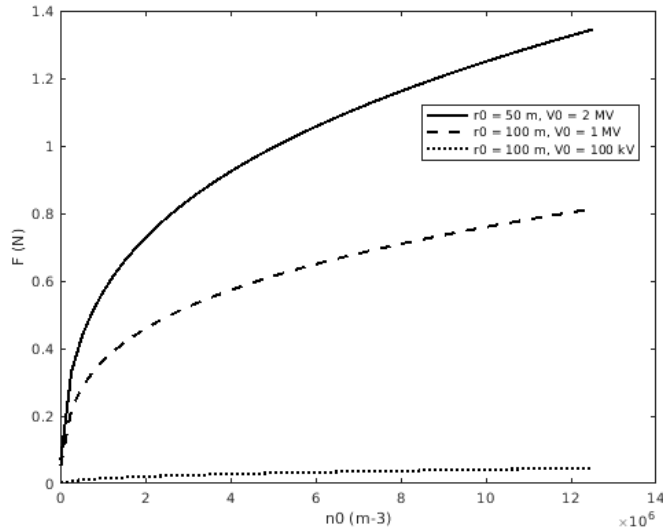

97

98 **Figure 3(b):** Figure 3(b) The relation between thrust  $F$  and the plasma density of solar wind  $n_0$ . Dotted:  $r_0 = 50$  m,  $V_0 = 2$  MV,  
99 dashed:  $r_0 = 100$  m,  $V_0 = 1$  MV, solid:  $r_0 = 100$  m,  $V_0 = 100$  kV.

100

**Table1:** scaling relation between thrust  $F$  and  $V_0, n_0, r_0$ .

| $n_0 / 10^5 \text{ m}^{-3}$ | $V_0 / \text{V}$ | $r_0 / \text{m}$ | Scaling                  |
|-----------------------------|------------------|------------------|--------------------------|
| 5.0                         | -                | 10               | $F \propto V_0^{1.4715}$ |
| 5.0                         | -                | 50               | $F \propto V_0^{1.3257}$ |
| 5.0                         | -                | 100              | $F \propto V_0^{1.2771}$ |
| 1.0                         | -                | 100              | $F \propto V_0^{1.3290}$ |
| -                           | 100 k            | 10               | $F \propto n_0^{0.5723}$ |
| -                           | 100 k            | 100              | $F \propto n_0^{0.4360}$ |
| -                           | 1.0 M            | 10               | $F \propto n_0^{0.5330}$ |
| -                           | 1.0 M            | 50               | $F \propto n_0^{0.3724}$ |
| -                           | 1.0 M            | 100              | $F \propto n_0^{0.3183}$ |
| 5.0                         | 100 k            | -                | $F \propto r_0^{0.8603}$ |
| 1.0                         | 1.0 M            | -                | $F \propto r_0^{0.6804}$ |
| 5.0                         | 1.0 M            | -                | $F \propto r_0^{0.6804}$ |

101

102 To estimate the electrons flux, we use the Orbital Motion Limited (OML) theory <sup>[1][10]</sup>. An electron will be captured  
103 when its trajectory meets the surface of the sphere. The electrons from solar wind coming from 1 direction, if the impact  
104 parameter (distance of electron from centre of sphere and perpendicular to its own velocity) lies within certain value, the  
105 electron will be absorbed by the sphere. Assuming that the electrons only come from solar wind, and experience a central force.  
106 With simple mechanic invariants, we can calculate the current:

$$107 \quad I = \pi r_s^2 e n_0 v, \tag{4}$$

108 Where  $n_0$  is the density of the electron in solar wind,  $v$  is the velocity of incoming electron.  $r_s = r_0 \sqrt{1 + \frac{2eV_0}{mv^2}}$  is the impact  
109 parameter. All electrons aimed at impact parameter less than  $r_s$  will hit on the surface of the sphere.

#### 110 4 2D Simulation

111 In this section, we provide a PIC 2D simulation describe the behavior of the particles. The simulation region is has a cylindrical  
112 symmetry along the x-axis. Similar to figure 2, both the protons and electrons constantly flow in from the +x direction. The  
113 electric field is solved by Coulomb equation. The potential of the sphere (spacecraft) is  $V_0$ . All the electrons moving inside the  
114 sphere are absorbed.

115 The simulation span across a region of 18 km \* 9 km, with spatial grid varying linearly from 10 m to 1800 m. The  
116 grid size is small at the origin to provide a more precise result around the spacecraft. With plasma density of  $n_0 = 5.0 \times$   
117  $10^4 \text{ m}^{-3}$ , the Langmuir frequency for electron is equivalent to  $\omega_{pe} = 1.3 \times 10^4 \text{ s}^{-1}$ . The timestep is set to  $\Delta t = 7.75 \times$   
118  $10^{-5} \text{ s}$ . We run 2 cases, (1)  $V_0 = 1 \text{ MV}$ ,  $r_0 = 100 \text{ m}$ , (2)  $V_0 = 2 \text{ MV}$ ,  $r_0 = 50 \text{ m}$ , with  $T = 32000 \Delta t$ .

119 **Figure 4(a) shows the established stable contour plot of the potential. The horizontal axis (X-axis) is parallel to the**  
120 **direction of solar wind (coming from right).** We can see there is a high potential area on the incoming side of the solar wind.  
121 This means the spacecraft can couple or interact with a large range of the ambient plasma. Figure 4(b) is for ion density. The  
122 concentration of ions on the right side is because the ions have nowhere to go. Figure 4(c) is for electron density; note the high  
123 concentration of electrons around the spacecraft.

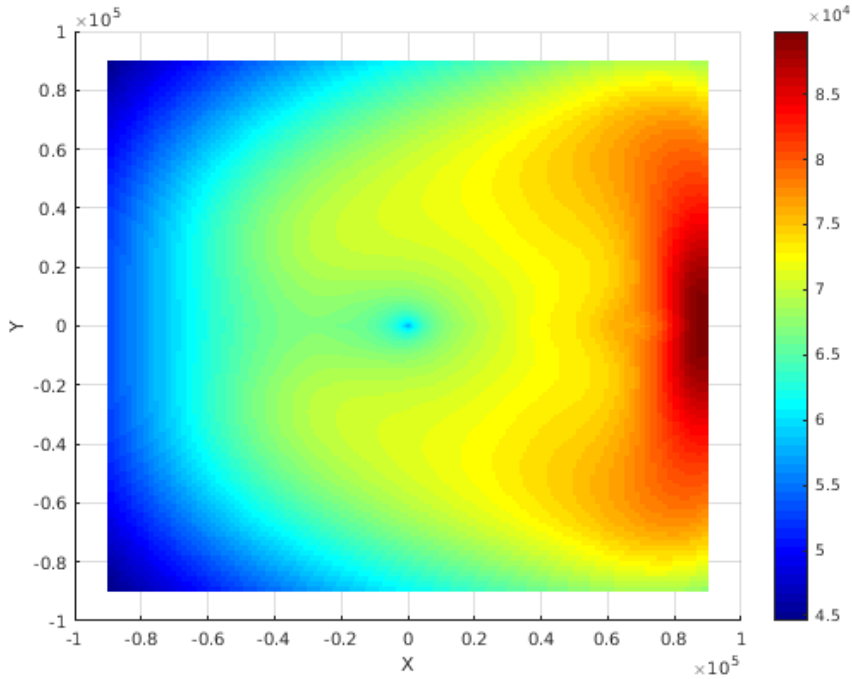

124

125

126

**Figure 4(a):** The plasma potential when simulation reached static state ( $T = 32000 \Delta t, \Delta t = 7.75 \times 10^{-5}$  s), the spacecraft located at the origin.

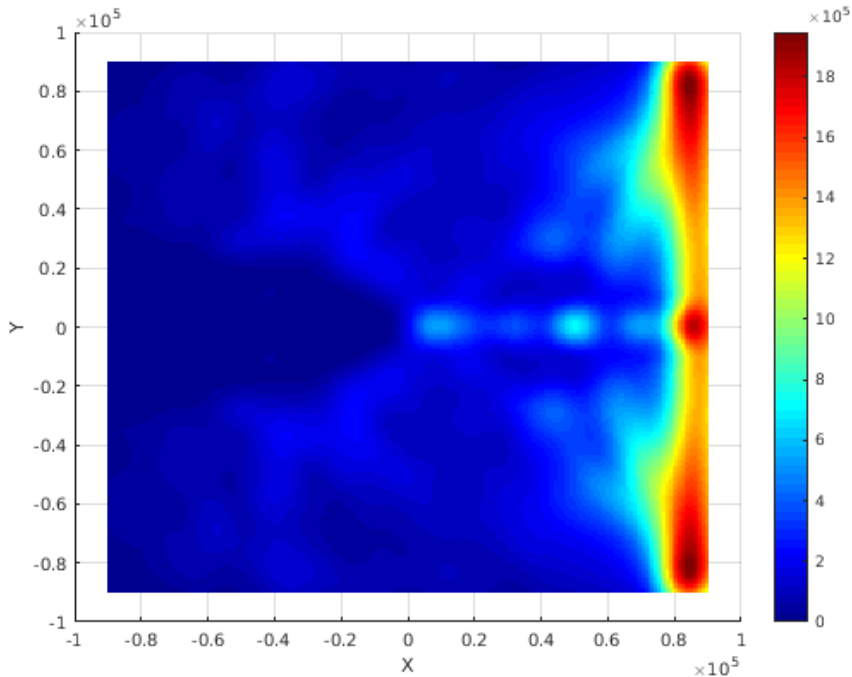

127

128  
129

Figure 4(b): The ion density when simulation reached static state. Ions is repelled by the sphere, hence low ion density at the left side. A large portion of ions accumulation at the right side of the region is due to the boundary effect.

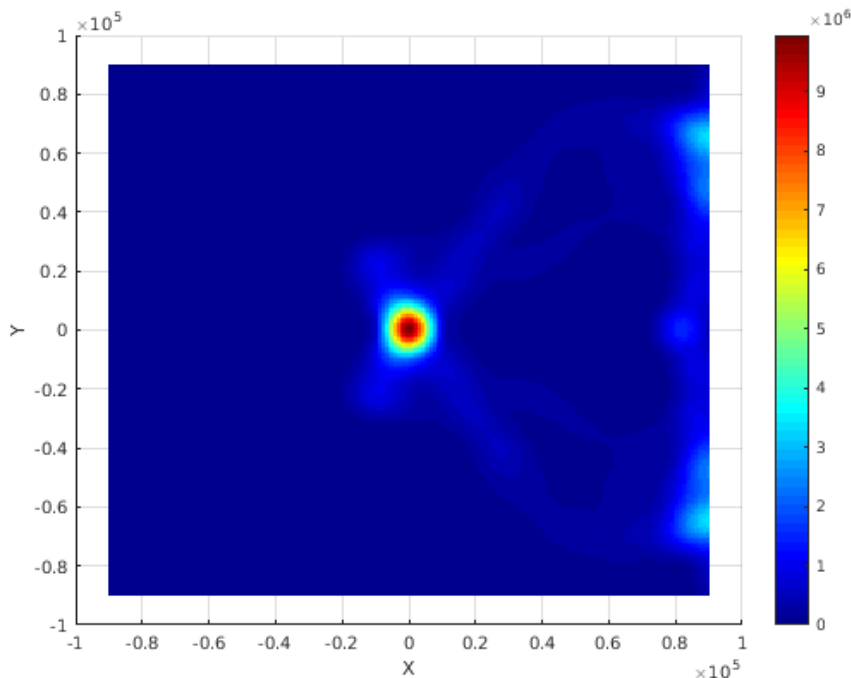

130

131

Figure 4(c): The electron density when simulation reached static state. Electrons in the region almost depleted.

132

133

134

135

136

137

The thrust acting on the sphere and the electron current is calculated and compared with 1D simulation in table 2. In 2D simulation, the thrust is 2~3 times larger than that of 1D simulation, and the electron current lower. As 1D simulation is based on plasma shielding, hence, larger thrust in 2D simulation imply the momentum coupling between the spacecraft and the ambient plasma is stronger than plasma shielding.

Table 2: Comparison between 1D and 2D simulation result.

| $V_0, r_0$  | 1D Simulation |              | 2D Simulation |              |
|-------------|---------------|--------------|---------------|--------------|
|             | Thrust / N    | Current / mA | Thrust / N    | Current / mA |
| 1 MV, 100 m | 0.52          | 168          | 1.6           | 102          |
| 2 MV, 50 m  | 0.77          | 84           | 1.6           | 73           |

138

## 5 Interplanetary Travel



139 In this section, we consider a simplified journey starting from Earth's orbit to outer planet such as Mars and Jupiter. **1d**  
 140 **calculation only takes account of single particle trajectory, other than the collective behavior of the plasma, the result may**  
 141 **serve as a reference, and 2D simulation can estimate the thrust generated by solar wind.** The thrust generated depends on the  
 142 ambient plasma density  $n_0$ , and  $n_0$  drops by inversely square law of the distance,  $D$ , from the Sun.

143 Assuming

$$144 F(D) = A \cdot D^k, \quad (5)$$

145 Where  $F$  is the thrust,  $D$  is the distance to the Sun.  $k$  is a scaling coefficient obtained from 1D simulation.  $A$  is a  
 146 constant determined by 2D simulation. From 1D simulation,  $k$  is within the range from -1.3 to -1.5 **(due to the fact that distance**  
 147 **to the Sun affect the plasma density and plasma shielding effect)**. Adding the force into the equation of motion of the spacecraft:

$$148 m(\ddot{D} - D\dot{\theta}^2) = -\frac{GM_S m}{D^2} + F(D), \quad (6)$$

149 Where  $M_S$  and  $m$  are the mass of the Sun and spacecraft respectively,  $\theta$  is the angular coordinate of the spacecraft in  
 150 a polar coordinate system with the Sun located at the center. By solving the equation of motion numerically with initial distance  
 151 being the radius of the orbit of the Earth, radial velocity being zero and tangential velocity equal to that of Earth, we can  
 152 calculate the trajectories of the spacecraft. Table 3 shows the time taken for each mission under various circumstances. The  
 153 main power consumption is from the electron accelerator (gun). It is calculated by multiplying the current of the electron gun  
 154 and the potential of the spacecraft.

155

**Table 3: Time taken for spacecraft to a journey to reach different planets.**

| $V_0$<br>(MV) | $r_0$<br>(m) | $m$<br>(kg) | Initial<br>acceleration<br>( $\text{mms}^{-2}$ ) | Time taken (days) |         |        |           | Power<br>(kW) |
|---------------|--------------|-------------|--------------------------------------------------|-------------------|---------|--------|-----------|---------------|
|               |              |             |                                                  | Mars              | Jupiter | Saturn | Pluto     |               |
| 0.3           | 100          | 240         | 0.85                                             | 265               | -       | -      | -         | 10            |
| 0.5           | 100          | 200         | 2.0                                              | 115               | 473     | 745    | 7.5 years | 26            |
| 0.5           | 100          | 300         | 1.3                                              | 152               | 834     | 1308   | 12 years  | 26            |
| 1.0           | 50           | 300         | 2.0                                              | 113               | 473     | 756    | 8 years   | 18            |
| 1.0           | 50           | 500         | 1.2                                              | 164               | 1206    | 1903   | 16 years  | 18            |

156

157 The most efficient way for sending spacecraft to a target planet is by orbit **transfer (Janhunen et al. 2014)**. The  
 158 spacecraft is transfer from a smaller orbit (Earth) to a larger orbit (Mars) following a Hohmann transfer orbit. In our case, for  
 159 planets like the Mars, the spacecraft can follow a similar orbit for energy efficiency. With a surface potential  $V_0 = 0.3$  MV,  
 160 effective radius  $r_0 = 100$  m, a spacecraft of mass  $m = 240$  kg can be transferred to the Mars.

## 161 **6 Result and discussions**

162 We proposed an ambient plasma momentum coupling spacecraft propelling scheme by utilizing high electric potential for the  
163 spacecraft to interact with a wide range of background plasma, which can be considered as a compact electric sail with a much  
164 smaller structure.

165 Preliminary calculations show that it is promising in space exploration. The simulation result shows that with a surface  
166 potential of the spacecraft of 1 MV, this scheme can produce a thrust of about 0.6 N, by consuming a power of about 18 kW.  
167 The simulation is performed in low plasma density. Since this scheme requires no propellant, it has an advantage over chemical  
168 rockets and ion thrusters. Comparing with the E-sail proposed by P. Janhunen, the relatively smaller structure (100 m to 1km  
169 versus 10 km) should be much easier to control or manoeuver. A simple calculation shows that a spacecraft of 500 kg can  
170 reach Mars in 164 days and Pluto in 16 years.

171 The scheme is also applicable in braking, as long as the momentum of ambient plasma is exploitable. In situations  
172 like braking near Jupiter, travelling to the inner planets, the plasma trapped by Jupiter and the solar wind can be used for  
173 braking.

174 This scheme can achieve very high interstellar travelling speed by delivering artificial dense and energetic beams to  
175 the spacecraft over a very long distance, by, for example, a series of powerful particle accelerators on the Moon, other satellites,  
176 or dwarf planets, thus drastically shorten the travelling time to the nearest stars from tens of thousands of years to a few  
177 hundreds of years.

178 If the situation is favorable, such as in a cosmic jet, a spacecraft could be accelerated to relativistic velocities.

## 179 **References**

- 180 Bleum, H. et al.: Electron Injectors for Next Generation X-Ray Sources, SPIE 49<sup>th</sup> Arizual Mtg., Denver, CO, 2-6 August  
181 (2004).
- 182 Forbes, R.G.: Extraction of Experimental ZERO-Q Evaporation Field Values, 15th Annual User Workshop of University of  
183 Surrey Ion Beam Centre, Guildford, UK, 2006, 545.
- 184 Janhunen, P.: Electric sail for spacecraft propulsion, Journal of Propulsion and Power, 20(4), 763–764, 2004.
- 185 Janhunen, P.: Coulomb drag devices: electric solar wind sail propulsion and ionospheric deorbiting, Space Propulsion 2014,  
186 Köln, Germany, May 19-22, 2014b, available at: <http://arxiv.org/abs/1404.7430>, 2014.
- 187 Janhunen, P.: Boltzmann electron PIC simulation of the E-sail effect, Ann. Geophys., 33, 1507-1512, 2015.
- 188 Janhunen, P. and Sandroos A.: Simulation study of solar wind push on a charged wire: basis of solar wind electric sail  
189 propulsion, Ann. Geophys., 25, 755–767, 2007.
- 190 Janhunen, P. and Toivanen P.: Safety criteria for flying E-sail through solar eclipse, Acta Astronautica, available at:  
191 <http://arXiv:1502.04557>, 2015.

192 Janhunen, P., et al.: Electric solar wind sail: towards test missions, *Rev. Sci. Instrum.*, 81, 111301, 2010.

193 Janhunen, P. et al.: Electric solar wind sail applications overview, available at: <https://arxiv.org/abs/1604.08414>, 2014.

194 Janhunen, P. et al.: CUBESAT testing of Coulomb drag propulsion, available at: <https://arxiv.org/abs/1604.08414>, 2016.

195 Richard, R. H., Development and characterization of high-efficiency, high-specific impulse xenon hall thrusters, NASA/CR—  
196 2004-213099., 2004

197 Tang, X.Z., Delzanno G.L.: Orbital-motion-limited theory of dust charging and plasma response, available at:  
198 <https://arxiv.org/abs/1503.07820>, 2015

199 Zurlev, D. N. et al.: Field ion emission: the effect of electrostatic field energy on the prediction of evaporation field and  
200 charge state, *J. Phys. D: Appl. Phys.* **36** (2003) L74–L78, 2003.

201
